# Supplementary material
Source: publisher figshare collection journal article supplement (https://asha.figshare.com/articles/dataset/_/14963637)
Supplement: Supplementary file 2 [file 1]

**Supplemental Table 3.** Methodological quality of the included studies.

Critical appraisal ratings of included studies evaluated with the ASHA's levels-of-evidence (ASHA's LOE) scheme (Mullen, 2007). Based on the quality score studies awarded with two to four points were classified as moderate, and studies awarded with five to seven points were classified as strong.

| <b>Study</b>          | <b>Study Design</b>   | <b>Assessor Blinded</b> | <b>Random Sample</b> | <b>Groups/ Participants Comparable</b> | <b>Valid Primary Outcome Measure(s)<sup>a</sup></b> | <b>Significance Reported or Calculable</b> | <b>Precision Reported or Calculable</b> | <b>Total Quality Score</b> |
|-----------------------|-----------------------|-------------------------|----------------------|----------------------------------------|-----------------------------------------------------|--------------------------------------------|-----------------------------------------|----------------------------|
| Balen et al., 2009    | Cross-sectional study | No                      | No                   | No                                     | Reasonable                                          | Yes                                        | Yes                                     | 2/7                        |
| Bellis et al., 2008   | Cross-sectional study | No                      | No                   | No                                     | Reasonable                                          | Yes                                        | Yes                                     | 2/7                        |
| Bellis et al., 2011   | Cross-sectional study | No                      | No                   | No                                     | Reasonable                                          | Yes                                        | Yes                                     | 2/7                        |
| Bench & Maule, 1997   | Case-control study    | No                      | No                   | No                                     | Reasonable                                          | Yes                                        | Yes                                     | 2/7                        |
| Cameron et al., 2006  | Cross-sectional study | No                      | No                   | No                                     | Reasonable                                          | Yes                                        | Yes                                     | 2/7                        |
| Dagenais et al., 1997 | Case-control study    | No                      | No                   | No                                     | Reasonable                                          | Yes                                        | Yes                                     | 2/7                        |

| <b>Study</b>             | <b>Study Design</b>   | <b>Assessor Blinded</b> | <b>Random Sample</b> | <b>Groups/ Participants Comparable</b> | <b>Valid Primary Outcome Measure(s)<sup>a</sup></b> | <b>Significance Reported or Calculable</b> | <b>Precision Reported or Calculable</b> | <b>Total Quality Score</b> |
|--------------------------|-----------------------|-------------------------|----------------------|----------------------------------------|-----------------------------------------------------|--------------------------------------------|-----------------------------------------|----------------------------|
| Dawes et al., 2009       | Cross-sectional study | No                      | No                   | No                                     | Reasonable                                          | Yes                                        | Yes                                     | 2/7                        |
| Elliott et al., 2007     | Case-control study    | No                      | No                   | No                                     | No                                                  | Yes                                        | Yes                                     | 2/7                        |
| Iliadou & Bamiou, 2012   | Case-control study    | No                      | No                   | No                                     | No                                                  | Yes                                        | Yes                                     | 2/7                        |
| Lagace et al., 2011      | Case-control study    | No                      | No                   | No                                     | Reasonable                                          | Yes                                        | Yes                                     | 2/7                        |
| Ludwig et al., 2014      | Case-control study    | No                      | No                   | No                                     | Reasonable                                          | Yes                                        | Yes                                     | 2/7                        |
| Putter-Katz et al., 2002 | Case-control study    | No                      | No                   | No                                     | No                                                  | Yes                                        | Yes                                     | 2/7                        |
| Rickard et al., 2013     | Case-control study    | No                      | No                   | No                                     | Reasonable                                          | Yes                                        | Yes                                     | 2/7                        |
| Rocha-Muniz et al., 2014 | Cross-sectional study | No                      | No                   | No                                     | Reasonable                                          | Yes                                        | Yes                                     | 2/7                        |
| Yalçinkaya et al., 2009  | Case-control study    | No                      | No                   | No                                     | No                                                  | Yes                                        | Yes                                     | 2/7                        |

| <b>Study</b>           | <b>Study Design</b>   | <b>Assessor Blinded</b> | <b>Random Sample</b> | <b>Groups/ Participants Comparable</b> | <b>Valid Primary Outcome Measure(s)<sup>a</sup></b> | <b>Significance Reported or Calculable</b> | <b>Precision Reported or Calculable</b> | <b>Total Quality Score</b> |
|------------------------|-----------------------|-------------------------|----------------------|----------------------------------------|-----------------------------------------------------|--------------------------------------------|-----------------------------------------|----------------------------|
| Barry et al., 2015     | Case-control study    | No                      | No                   | No                                     | <b>Yes</b>                                          | <b>Yes</b>                                 | <b>Yes</b>                              | 3/7                        |
| Burgueti et al., 2008  | Case-control study    | No                      | No                   | No                                     | <b>Yes</b>                                          | <b>Yes</b>                                 | <b>Yes</b>                              | 3/7                        |
| Butler et al., 2011    | Case-control study    | No                      | No                   | No                                     | <b>Yes</b>                                          | <b>Yes</b>                                 | <b>Yes</b>                              | 3/7                        |
| Cameron & Dillon, 2008 | Cross-sectional study | No                      | No                   | No                                     | <b>Yes</b>                                          | <b>Yes</b>                                 | <b>Yes</b>                              | 3/7                        |
| Dhamani et al., 2013   | Cross-sectional study | No                      | No                   | <b>Yes</b>                             | Reasonable                                          | <b>Yes</b>                                 | <b>Yes</b>                              | 3/7                        |
| Farah et al., 2014     | Case-control study    | No                      | No                   | No                                     | <b>Yes</b>                                          | <b>Yes</b>                                 | <b>Yes</b>                              | 3/7                        |
| Ferguson et al., 2011  | Cross-sectional study | No                      | No                   | No                                     | <b>Yes</b>                                          | <b>Yes</b>                                 | <b>Yes</b>                              | 3/7                        |
| Ferguson et al., 2014  | Cross-sectional study | No                      | No                   | No                                     | <b>Yes</b>                                          | <b>Yes</b>                                 | <b>Yes</b>                              | 3/7                        |

| <b>Study</b>             | <b>Study Design</b>   | <b>Assessor Blinded</b> | <b>Random Sample</b> | <b>Groups/ Participants Comparable</b> | <b>Valid Primary Outcome Measure(s)<sup>a</sup></b> | <b>Significance Reported or Calculable</b> | <b>Precision Reported or Calculable</b> | <b>Total Quality Score</b> |
|--------------------------|-----------------------|-------------------------|----------------------|----------------------------------------|-----------------------------------------------------|--------------------------------------------|-----------------------------------------|----------------------------|
| Gopal & Pierel, 1999     | Case-control study    | No                      | No                   | No                                     | <b>Yes</b>                                          | <b>Yes</b>                                 | <b>Yes</b>                              | 3/7                        |
| Gyldenkærne et al., 2014 | Case-control study    | No                      | No                   | No                                     | <b>Yes</b>                                          | <b>Yes</b>                                 | <b>Yes</b>                              | 3/7                        |
| Jirsa & Clontz, 1990     | Case-control study    | No                      | No                   | No                                     | <b>Yes</b>                                          | <b>Yes</b>                                 | <b>Yes</b>                              | 3/7                        |
| Kumar & Singh, 2015      | Case-control study    | No                      | No                   | No                                     | <b>Yes</b>                                          | <b>Yes</b>                                 | <b>Yes</b>                              | 3/7                        |
| Kreisman et al., 2012    | Case-control study    | No                      | No                   | No                                     | <b>Yes</b>                                          | <b>Yes</b>                                 | <b>Yes</b>                              | 3/7                        |
| Liasis et al., 2003      | Case-control study    | No                      | No                   | No                                     | <b>Yes</b>                                          | <b>Yes</b>                                 | <b>Yes</b>                              | 3/7                        |
| Maerlender, 2010         | Cross-sectional study | No                      | No                   | No                                     | <b>Yes</b>                                          | <b>Yes</b>                                 | <b>Yes</b>                              | 3/7                        |
| Moossavi et al., 2014    | Case-control study    | No                      | No                   | No                                     | <b>Yes</b>                                          | <b>Yes</b>                                 | <b>Yes</b>                              | 3/7                        |
| Muchnik et al., 2004     | Case-control study    | No                      | No                   | No                                     | <b>Yes</b>                                          | <b>Yes</b>                                 | <b>Yes</b>                              | 3/7                        |

| <b>Study</b>                 | <b>Study Design</b>   | <b>Assessor Blinded</b> | <b>Random Sample</b> | <b>Groups/ Participants Comparable</b> | <b>Valid Primary Outcome Measure(s)<sup>a</sup></b> | <b>Significance Reported or Calculable</b> | <b>Precision Reported or Calculable</b> | <b>Total Quality Score</b> |
|------------------------------|-----------------------|-------------------------|----------------------|----------------------------------------|-----------------------------------------------------|--------------------------------------------|-----------------------------------------|----------------------------|
| Pluta et al., 2014           | Case-control study    | No                      | No                   | No                                     | <b>Yes</b>                                          | <b>Yes</b>                                 | <b>Yes</b>                              | 3/7                        |
| Rocha-Muniz et al., 2012     | Cross-sectional study | No                      | No                   | No                                     | <b>Yes</b>                                          | <b>Yes</b>                                 | <b>Yes</b>                              | 3/7                        |
| Roggia & Colares, 2008       | Case-control study    | No                      | No                   | No                                     | <b>Yes</b>                                          | <b>Yes</b>                                 | <b>Yes</b>                              | 3/7                        |
| Rosen et al., 2010           | Case-control study    | No                      | No                   | No                                     | <b>Yes</b>                                          | <b>Yes</b>                                 | <b>Yes</b>                              | 3/7                        |
| Sanches & Carvalho, 2006     | Case-control study    | No                      | No                   | No                                     | <b>Yes</b>                                          | <b>Yes</b>                                 | <b>Yes</b>                              | 3/7                        |
| Schmithorst et al., 2013     | Case-control study    | No                      | No                   | No                                     | <b>Yes</b>                                          | <b>Yes</b>                                 | <b>Yes</b>                              | 3/7                        |
| Sharma et al., 2014          | Case-control study    | No                      | No                   | No                                     | <b>Yes</b>                                          | <b>Yes</b>                                 | <b>Yes</b>                              | 3/7                        |
| Sharma, Purdy, & Kelly, 2014 | Case-control study    | No                      | No                   | No                                     | <b>Yes</b>                                          | <b>Yes</b>                                 | <b>Yes</b>                              | 3/7                        |
| Tomlin et al., 2015          | Case-control study    | No                      | No                   | No                                     | <b>Yes</b>                                          | <b>Yes</b>                                 | <b>Yes</b>                              | 3/7                        |

| <b>Study</b>               | <b>Study Design</b>   | <b>Assessor Blinded</b> | <b>Random Sample</b> | <b>Groups/ Participants Comparable</b> | <b>Valid Primary Outcome Measure(s)<sup>a</sup></b> | <b>Significance Reported or Calculable</b> | <b>Precision Reported or Calculable</b> | <b>Total Quality Score</b> |
|----------------------------|-----------------------|-------------------------|----------------------|----------------------------------------|-----------------------------------------------------|--------------------------------------------|-----------------------------------------|----------------------------|
| Vanniasagaram et al., 2004 | Case-control study    | No                      | No                   | No                                     | <b>Yes</b>                                          | <b>Yes</b>                                 | <b>Yes</b>                              | 3/7                        |
| Yalçinkaya et al., 2010    | Case-control study    | No                      | No                   | No                                     | <b>Yes</b>                                          | <b>Yes</b>                                 | <b>Yes</b>                              | 3/7                        |
| Gopal et al., 2002         | Case-control study    | <b>Yes</b>              | No                   | No                                     | <b>Yes</b>                                          | <b>Yes</b>                                 | <b>Yes</b>                              | 4/7                        |
| James et al., 1994         | Case-control study    | No                      | No                   | <b>Yes</b>                             | <b>Yes</b>                                          | <b>Yes</b>                                 | <b>Yes</b>                              | 4/7                        |
| Jirsa, 2001                | Case-control study    | <b>Yes</b>              | No                   | No                                     | <b>Yes</b>                                          | <b>Yes</b>                                 | <b>Yes</b>                              | 4/7                        |
| Olakunbi et al., 2010      | Case-control study    | No                      | No                   | <b>Yes</b>                             | <b>Yes</b>                                          | <b>Yes</b>                                 | <b>Yes</b>                              | 4/7                        |
| Moore et al., 2010         | Cross-sectional study | No                      | <b>Yes</b>           | <b>Yes</b>                             | <b>Yes</b>                                          | <b>Yes</b>                                 | <b>Yes</b>                              | 5/7                        |

*Note.* Studies are arranged from low to high quality score.

<sup>a</sup>At the criterion "Valid primary outcome measures," three answer options were possible, namely: *Yes*, *Reasonable*, and *No*. All other criterion had two possible outcomes, *Yes* or *No*. Boldface indicates highest level of quality in each category.
