# Supplementary material
Source: publisher figshare collection journal article supplement (https://asha.figshare.com/articles/dataset/_/14963637)
Supplement: Supplementary file 3 [file 1]

**Supplemental Table 2.** Methodological quality of the excluded studies.

Critical appraisal ratings of excluded studies evaluated with the ASHA’s levels-of-evidence (ASHA’s LOE) scheme (Mullen, 2007). Based on the quality score studies awarded with one or no points were classified as weak and were excluded from the review.

| Study                  | Study Design       | Assessor Blinded | Random Sample | Groups/ Participants Comparable | Valid Primary Outcome Measure(s) <sup>a</sup> | Significance Reported or Calculable | Precision Reported or Calculable | Total Quality Score |
|------------------------|--------------------|------------------|---------------|---------------------------------|-----------------------------------------------|-------------------------------------|----------------------------------|---------------------|
| Gopal & Kowalski, 1999 | Case-control study | No               | No            | No                              | <b>Yes</b>                                    | No                                  | No                               | 1/7                 |
| Meister et al., 2004   | Case-control study | No               | No            | No                              | No                                            | <b>Yes</b>                          | No                               | 1/7                 |
| Phillips et al., 2010  | Case-control study | No               | No            | No                              | No                                            | <b>Yes</b>                          | No                               | 1/7                 |
| Tobey et al., 1979     | Case-control study | No               | No            | No                              | No                                            | <b>Yes</b>                          | No                               | 1/7                 |
| Zwissler et al., 2014  | Case-control study | No               | No            | No                              | <b>Yes</b>                                    | No                                  | No                               | 1/7                 |

<sup>a</sup>At the criterion “Valid primary outcome measures,” three answer options were possible, namely: *Yes*, *Reasonable*, and *No*. All other criterion had two possible outcomes, *Yes* or *No*. Boldface indicates highest level of quality in each category.
