# Supplementary material
Source: publisher figshare collection journal article supplement (https://asha.figshare.com/articles/dataset/_/14963637)
Supplement: Supplementary file 4 [file 1]

**Supplemental Table 1.** Quality indicators in the ASHA levels-of-evidence scheme (Mullen, 2007).

| Indicator                                                        | Quality Marker                                                                                                                                                                                                                                                                                                                          |
|------------------------------------------------------------------|-----------------------------------------------------------------------------------------------------------------------------------------------------------------------------------------------------------------------------------------------------------------------------------------------------------------------------------------|
| Study design                                                     | <ul style="list-style-type: none"> <li>• <b>Controlled trial</b></li> <li>• Cohort study</li> <li>• Single-subject design or case control study</li> <li>• Cross-sectional study or Case series</li> <li>• Case study</li> </ul>                                                                                                        |
| Blinding                                                         | <ul style="list-style-type: none"> <li>• <b>Yes = Assessors blinded</b></li> <li>• No = Assessors not blinded or not stated</li> </ul>                                                                                                                                                                                                  |
| Sampling                                                         | <ul style="list-style-type: none"> <li>• <b>Yes = Random sample adequately described</b></li> <li>• No = Random sample inadequately described</li> <li>• No = Convenience sample adequately described</li> <li>• No = Convenience sample inadequately described or hand-picked sample or not stated</li> </ul>                          |
| Group/participant comparability                                  | <ul style="list-style-type: none"> <li>• <b>Yes = Groups comparable at baseline on important factors (between-subject design) or subject(s) adequately described (within subject design)</b></li> <li>• No = Groups/subjects not comparable at baseline or comparability not reported or subject(s) not adequately described</li> </ul> |
| Outcomes                                                         | <ul style="list-style-type: none"> <li>• <b>Yes = At least one primary outcome measure is valid and reliable</b></li> <li>• Reasonable = Validity is unknown but appears reasonable; measure is reliable</li> <li>• No = Invalid and/or unreliable</li> </ul>                                                                           |
| Significance                                                     | <ul style="list-style-type: none"> <li>• <b>Yes = <i>P</i> value reported or calculable</b></li> <li>• No = <i>P</i> value neither reported nor calculable</li> </ul>                                                                                                                                                                   |
| Precision                                                        | <ul style="list-style-type: none"> <li>• <b>Yes = Effect size and confidence interval reported or calculable</b></li> <li>• No = Effect size or confidence interval, but not both, reported or calculable</li> <li>• No = Neither effect size or confidence interval reported or calculable</li> </ul>                                  |
| <i>Note.</i> Boldface indicates highest level of quality marker. |                                                                                                                                                                                                                                                                                                                                         |
